# Supplementary material for: Carbohydrate vs protein supplementation for recovery of neuromuscular function following prolonged load carriage
Source: Springer Nature journal article supplement (doi:10.1186/1550-2783-7-2), 2010-01-05
Supplement: Additional file 1 [file 1550-2783-7-2-s1.doc]

**Responses during electrically stimulated isometric contractions of the knee extensors*.***Measurements were takenbefore (Pre) and after (0, 24, 48 and 72 h) 120 minutes of treadmill walking at 6.5 km·h-1 (n=10) on a level gradient (0%) carrying a 25 kg backpack. Either a placebo beverage (PLA), carbohydrate (6.4%) beverage (CHO) or protein (7%) beverage (PRO) was consumed at 0 and 60 minutes (250 ml) during treadmill walking or twice daily (500 ml, morning and evening) for the 3 days after load carriage (n = 10). *, different from pre-value (P<0.05).

| Variable | Condition | Pre | | | 0 h | | | 24 h | | | 48 h | | | 72 h | | |
| --- | --- | --- | --- | --- | --- | --- | --- | --- | --- | --- | --- | --- | --- | --- | --- | --- |
| VA (%) | PLA | 98 | ± | 4 | 93 | ± | 11* | 96 | ± | 3 | 95 | ± | 9 | 96 | ± | 7 |
| CHO | 97 | ± | 4 | 92 | ± | 9* | 95 | ± | 9 | 95 | ± | 5 | 97 | ± | 7 |
| PRO | 98 | ± | 3 | 92 | ± | 6 * | 93 | ± | 10 | 94 | ± | 9 | 96 | ± | 7 |
| Doublet Peak Force (N) | PLA | 174 | ± | 39 | 173 | ± | 39 | 170 | ± | 46 | 175 | ± | 50 | 176 | ± | 33 |
| CHO | 171 | ± | 41 | 166 | ± | 34 | 171 | ± | 32 | 170 | ± | 29 | 169 | ± | 34 |
| PRO | 175 | ± | 44 | 174 | ± | 46 | 171 | ± | 50 | 172 | ± | 42 | 174 | ± | 42 |
| Doublet Contraction Time (s) | PLA | 0.187 | ± | 0.007 | 0.181 | ± | 0.009* | 0.187 | ± | 0.010 | 0.187 | ± | 0.017 | 0.189 | ± | 0.011 |
| CHO | 0.185 | ± | 0.006 | 0.184 | ± | 0.010* | 0.187 | ± | 0.009 | 0.185 | ± | 0.009 | 0.187 | ± | 0.006 |
| PRO | 0.184 | ± | 0.011 | 0.182 | ± | 0.007* | 0.186 | ± | 0.010 | 0.186 | ± | 0.009 | 0.188 | ± | 0.008 |
| Average Rate of Doublet Tension Development (N·s-1) | PLA | 933 | ± | 214 | 953 | ± | 218 | 906 | ± | 237 | 930 | ± | 234 | 932 | ± | 163 |
| CHO | 922 | ± | 207 | 904 | ± | 179 | 915 | ± | 185 | 919 | ± | 168 | 901 | ± | 173 |
| PRO | 948 | ± | 227 | 951 | ± | 236 | 920 | ± | 249 | 921 | ± | 195 | 927 | ± | 220 |
| Doublet Half Relaxation Time (s) | PLA | 0.100 | ± | 0.009 | 0.098 | ± | 0.009* | 0.099 | ± | 0.011 | 0.099 | ± | 0.011* | 0.100 | ± | 0.012 |
| CHO | 0.100 | ± | 0.011 | 0.096 | ± | 0.006* | 0.100 | ± | 0.012 | 0.098 | ± | 0.010* | 0.097 | ± | 0.008 |
| PRO | 0.100 | ± | 0.013 | 0.095 | ± | 0.010* | 0.099 | ± | 0.011 | 0.098 | ± | 0.010* | 0.099 | ± | 0.009 |
| Doublet Maximal Rate of Force Development (N·s-1) | PLA | 1664 | ± | 402 | 1631 | ± | 379 | 1602 | ± | 406 | 1649 | ± | 412 | 1681 | ± | 310 |
| CHO | 1650 | ± | 406 | 1594 | ± | 318 | 1647 | ± | 356 | 1618 | ± | 328 | 1613 | ± | 318 |
| PRO | 1679 | ± | 422 | 1656 | ± | 427 | 1616 | ± | 410 | 1652 | ± | 365 | 1671 | ± | 359 |
| Doublet Maximal Rate of Force Decrease (N·s-1) | PLA | -1326 | ± | 354 | -1348 | ± | 371 | -1301 | ± | 390 | -1324 | ± | 389 | -1339 | ± | 335 |
| CHO | -1315 | ± | 362 | -1326 | ± | 294 | -1311 | ± | 372 | -1330 | ± | 292 | -1319 | ± | 304 |
| PRO | -1350 | ± | 407 | -1405 | ± | 420 | -1315 | ± | 397 | -1339 | ± | 383 | -1343 | ± | 344 |
| 20:50 Hz Ratio | PLA | 0.88 | ± | 0.04 | 0.83 | ± | 0.06 | 0.83 | ± | 0.07* | 0.83 | ± | 0.06* | 0.85 | ± | 0.06 |
| CHO | 0.87 | ± | 0.05 | 0.85 | ± | 0.06 | 0.83 | ± | 0.04* | 0.83 | ± | 0.03* | 0.85 | ± | 0.07 |
| PRO | 0.84 | ± | 0.06 † | 0.82 | ± | 0.07 | 0.81 | ± | 0.08* | 0.83 | ± | 0.05* | 0.86 | ± | 0.06 |
